# Supplementary material for: Effect of access resistance on the experimentally measured temperature–carrier mobility dependence in highly-crystalline DNTT-based transistors
Source: Royal Society of Chemistry journal article supplement (doi:10.1039/d0ma00530d), 2020-01-01
Supplement: d0ma00530d1.pdf [file d0ma00530d1.pdf]

**Electronic Supplementary Information (ESI)**

**Effect of Access Resistance on Temperature-Carrier Mobility Dependence in High-Crystalline DNNT-Based Transistors**

Qijing Wang, Sai Jiang, Yi Shi,\* and Yun Li\*

†National Laboratory of Solid-State Microstructures, School of Electronic Science and Engineering,

Collaborative Innovation Center of Advanced Microstructures, Nanjing University, Nanjing 210093, P. R. China

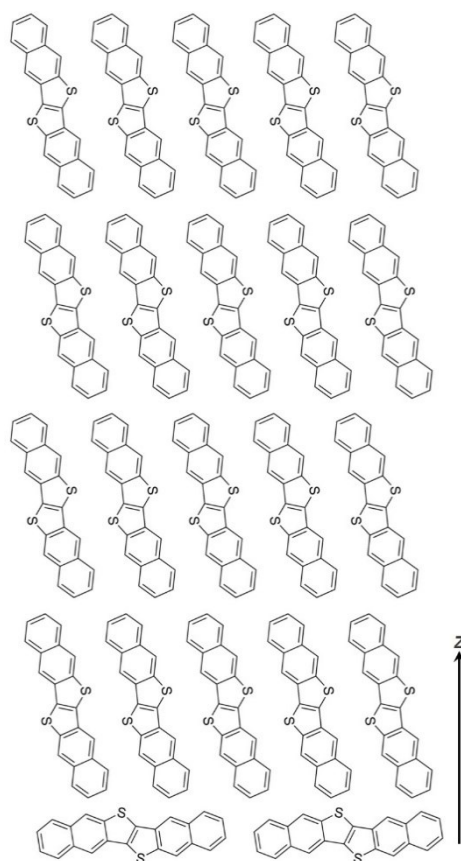

**Figure S1.** Schematic illustration of the molecular packing of the evaporated DNTT films.

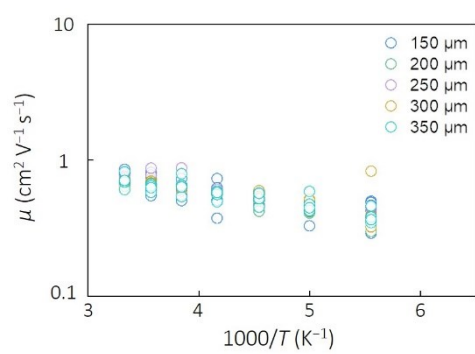

**Figure S2.** Field-effect mobility of slow- evaporated DNTT transistors with  $L > 100 \mu\text{m}$  as a function of temperature.

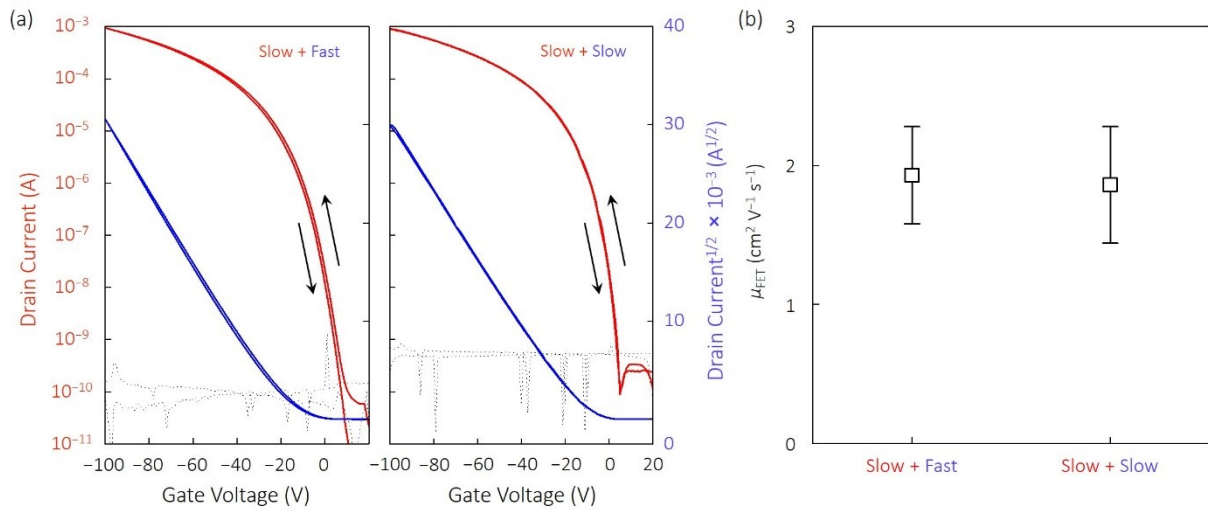

**Figure S3.** (a) Transfer characteristics at a drain voltage of  $-100$  V of OFETs based on the 20 nm-thick DNTT films deposited by fast (left) and slow (right) evaporation, respectively. (b) The carrier mobility of OFET samples based on both evaporated DNTT films. The temperature of these measurements was 300 K.

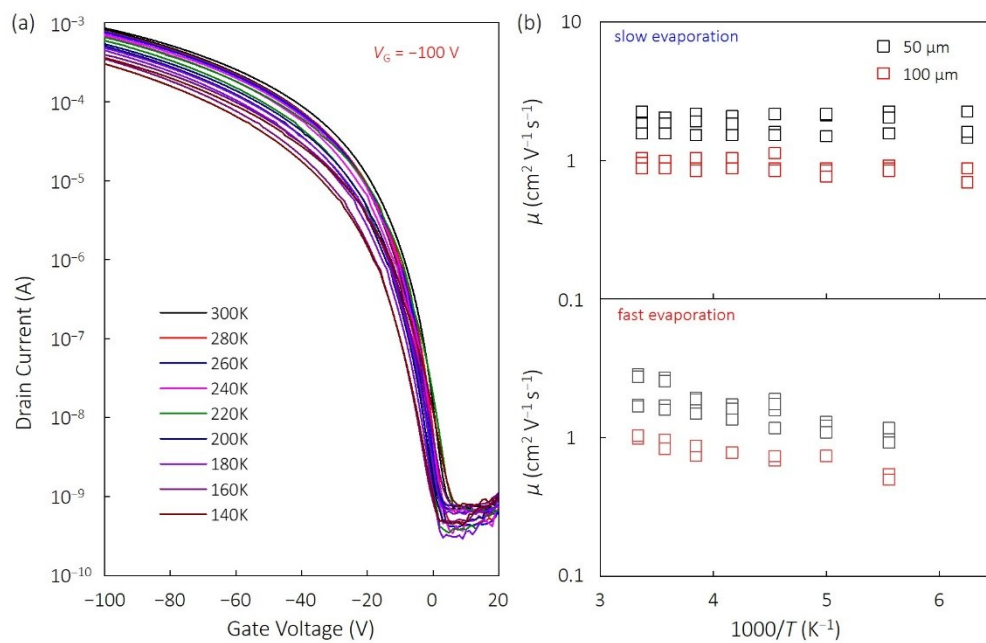

**Figure S4.** (a) Temperature-dependent electrical property of DNTT transistors based on fast-evaporated DNTT films. (b) Field-effect mobility of slow- and fast-evaporated DNTT transistors as a function of temperature. Channel width is 500  $\mu\text{m}$  and channel length are 50  $\mu\text{m}$  (black square) and 100  $\mu\text{m}$  (red square), respectively.

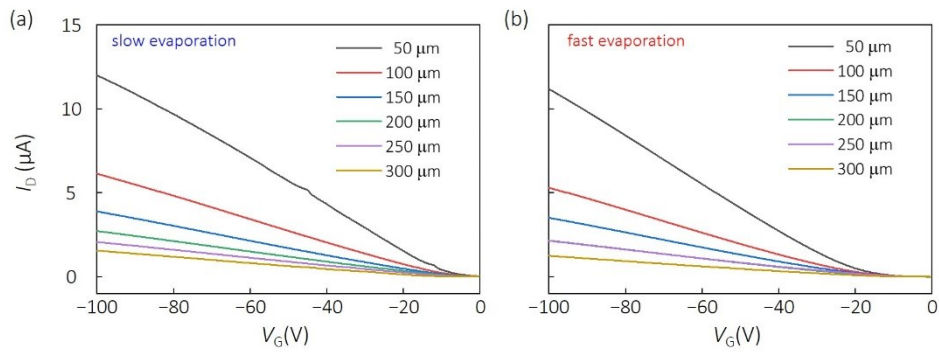

**Figure S5.** Typical transfer characteristics of the 20 nm-thick (a) slow- and (b) fast-evaporated DNTT-based devices at  $V_G = -1$  V at room temperature. The channel length varies from 50 to 300  $\mu\text{m}$  for TLM analysis, and the channel width is fixed at 500  $\mu\text{m}$ .

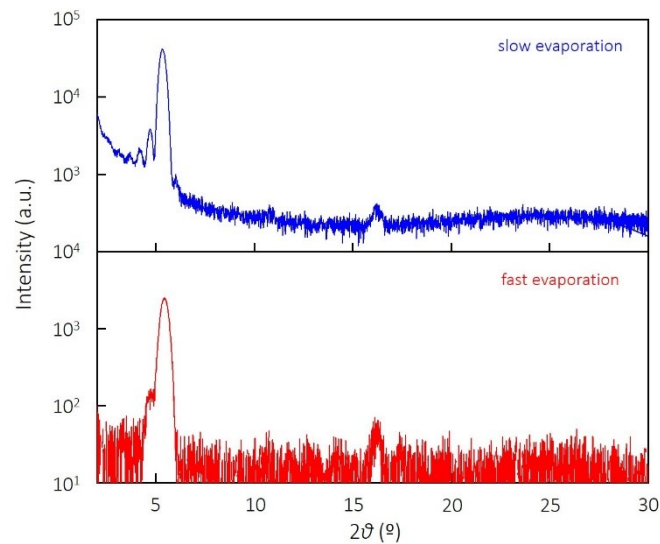

**Figure S6.** XRD patterns on a logarithmic scale of (up) slow- and (bottom) fast-evaporated 20 nm-thick DNTT films. The peaks at  $2\theta = 5.31^\circ$  and  $5.43^\circ$  in these samples both correspond to the (001) peak.

**Table S1.** Characteristics of OFETs based on fast- and slow-evaporated DNTT films on SiO<sub>2</sub> dielectric in saturation

regime.

| Semiconducting layer | $\mu_{\text{FET}}$<br>(cm <sup>2</sup> V <sup>-1</sup> s <sup>-1</sup> ) | On/off          | $V_{\text{T}}$<br>(V) | SS<br>(V dec <sup>-1</sup> ) | $N_{\text{trap}}$<br>( $\times 10^{12}$ cm <sup>-2</sup> ) |
|----------------------|--------------------------------------------------------------------------|-----------------|-----------------------|------------------------------|------------------------------------------------------------|
| Fast-evaporated      | 1.93                                                                     | 10 <sup>6</sup> | -18.7                 | 3.89                         | 4.62                                                       |
| Slow-evaporated      | 2.04                                                                     | 10 <sup>6</sup> | -18.9                 | 2.18                         | 2.56                                                       |

**Note S1:** A nearly linear increase in the small range of drain voltage ( $V_D = 0 \sim -10$  V) in the output curves was clearly observed. This feature was considered as the sign of a nearly Ohmic contact with an efficient charge injection at the Au/DNTT interface. However, based on our previous work, we found that this feature was often observed when the contact resistance is much lower than that of the channel resistance. On the other hand, although the work function of Au ( $\sim 5.1$  eV) is close to the HOMO of DNTT ( $\sim 5.2$  eV), the energy level mismatch between these two materials still needs to be determined by the Au/DNTT interface property, since the many external factors (e.g. the deposition of the metal contacts by thermal evaporation has complex effects on the  $\Phi_B$  due to the formation of interface dipoles and/or the generation of gap states) influence the energy barrier.
